# Supplementary material
Source: PubMed Central journal article supplement (PMC6594409)

**a**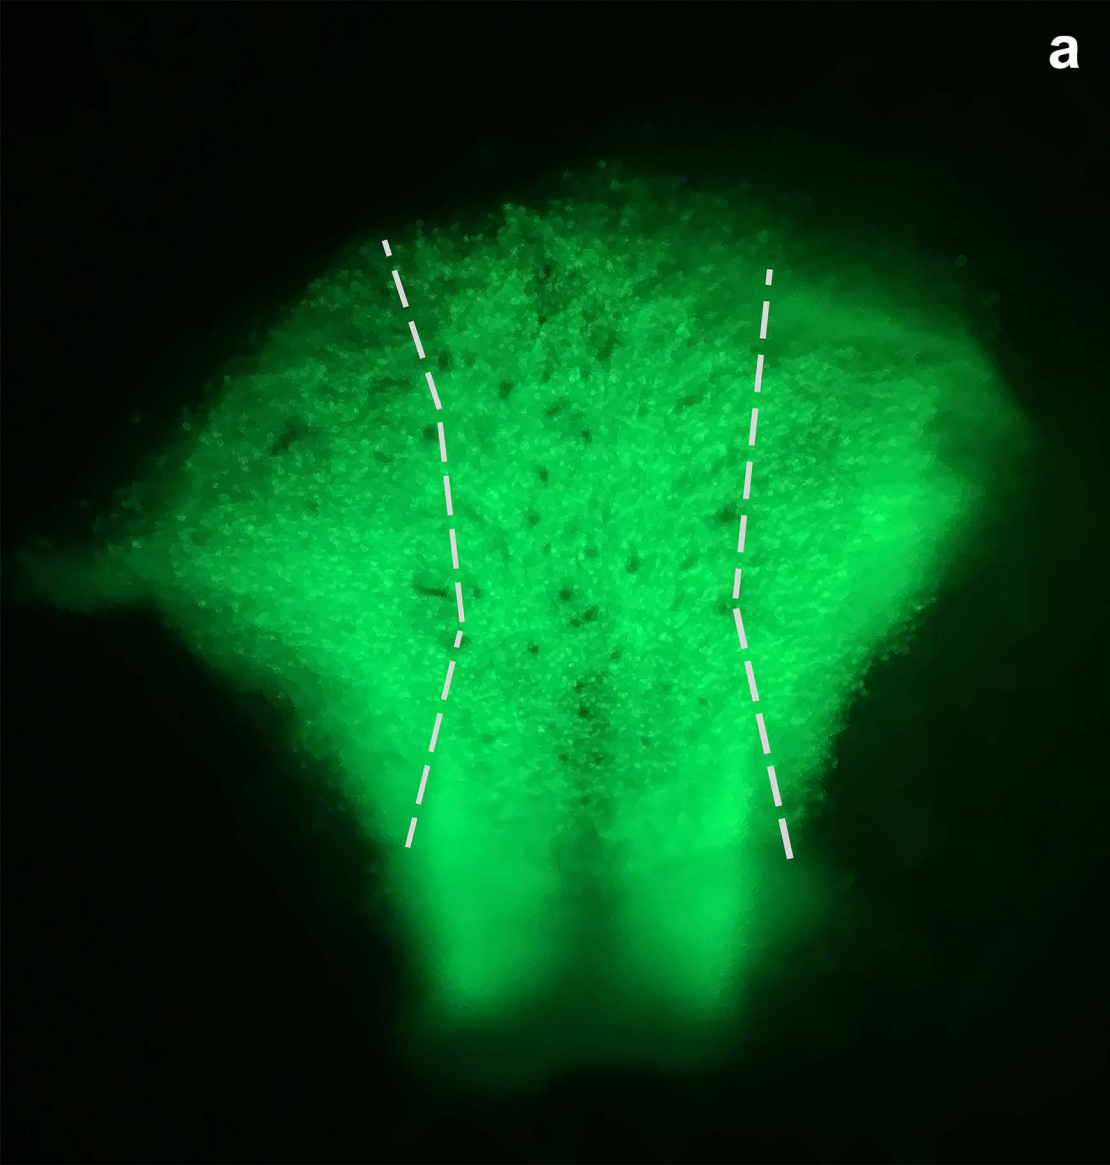**b**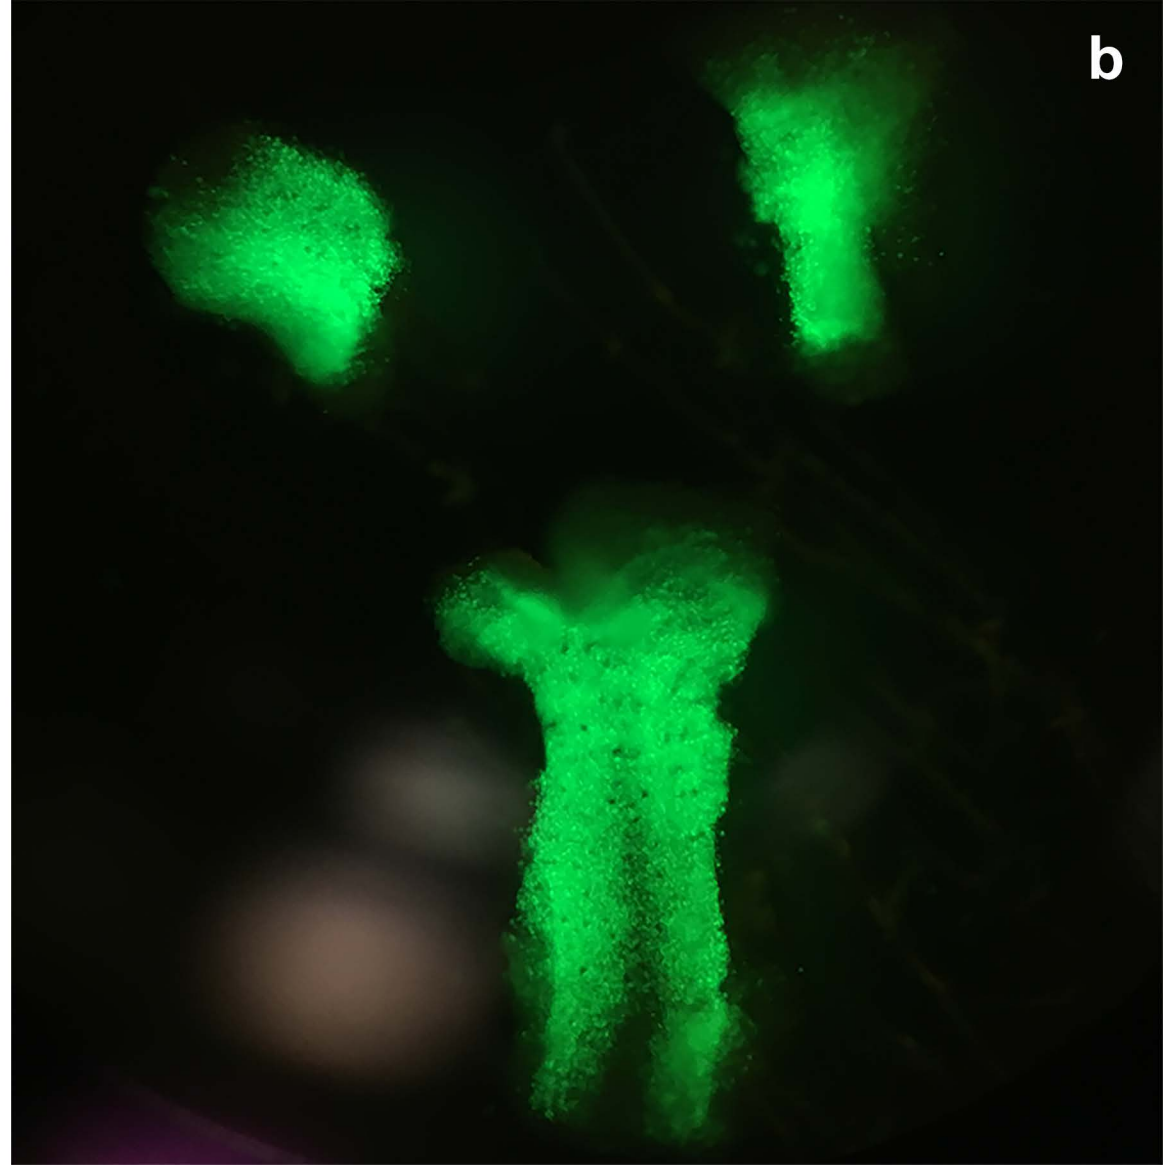

VTA Bead Samples  
 $\Delta$ CT vs GAPDH  
(Mean +/- SEM)

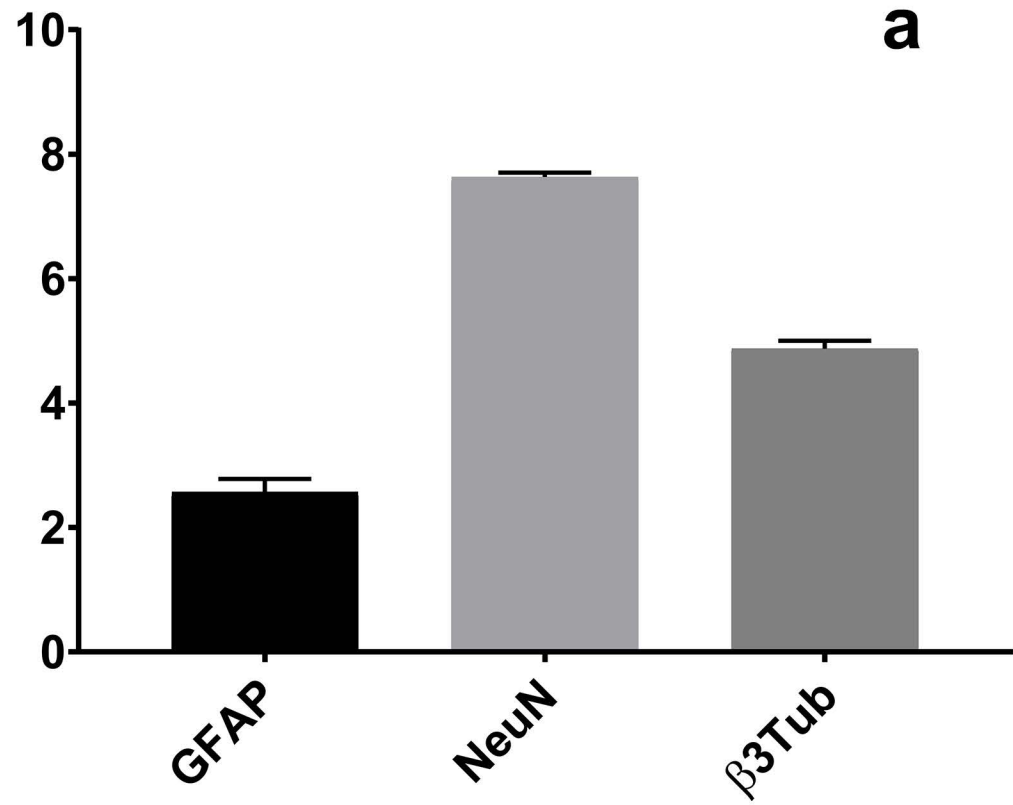

SN Bead Samples  
 $\Delta$ CT vs GAPDH  
(Mean +/- SEM)

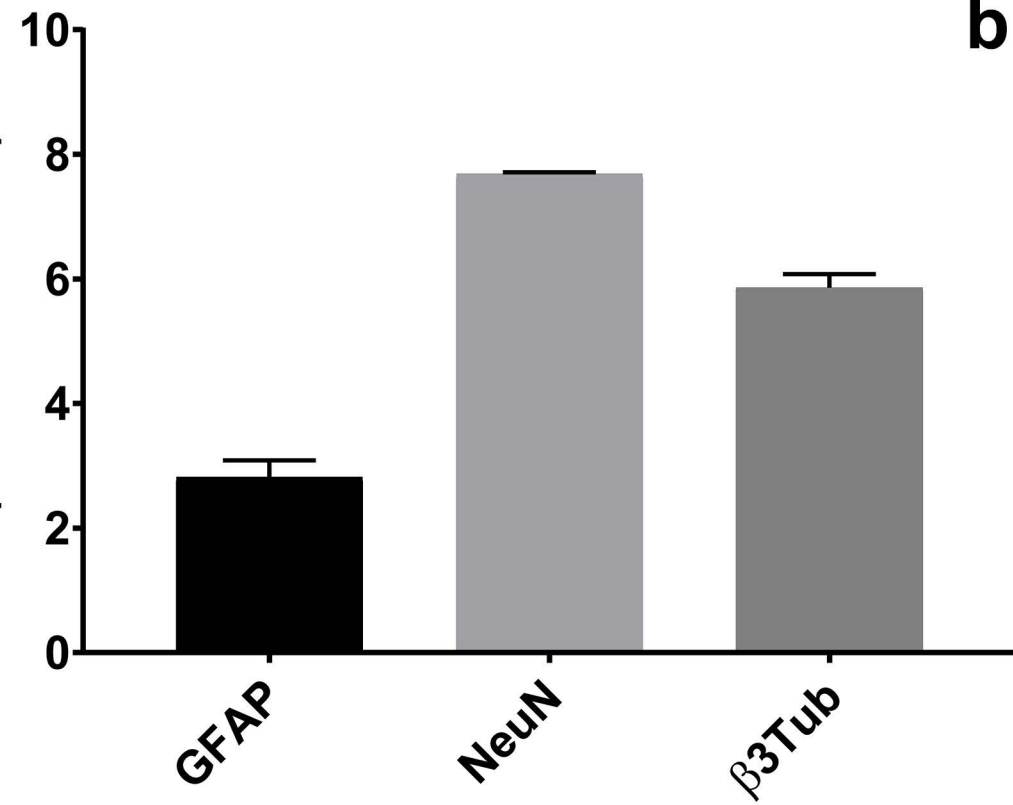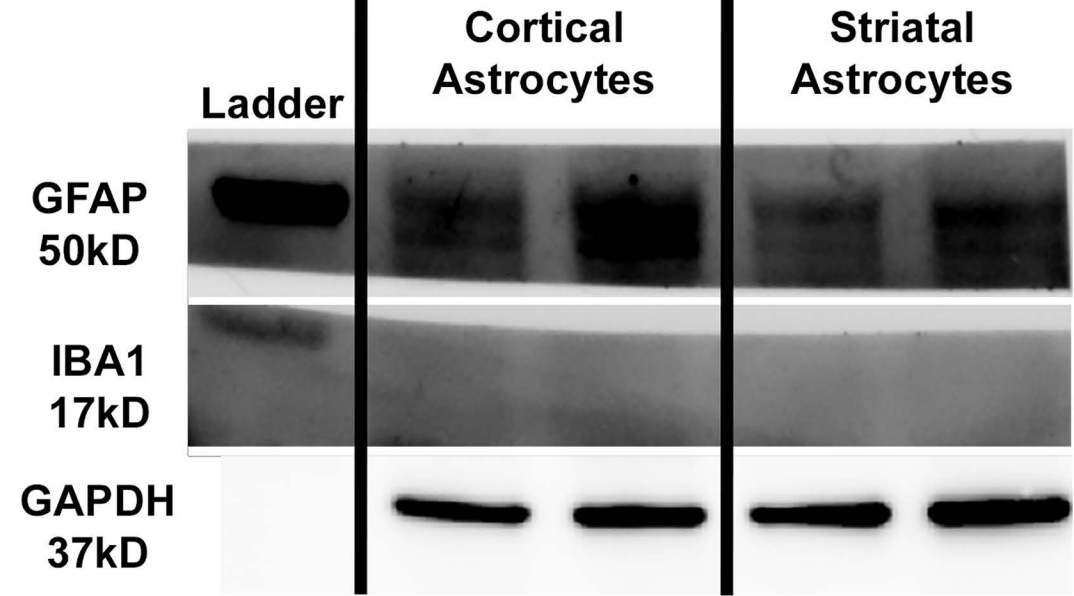

0 $\mu$ M Ara-C

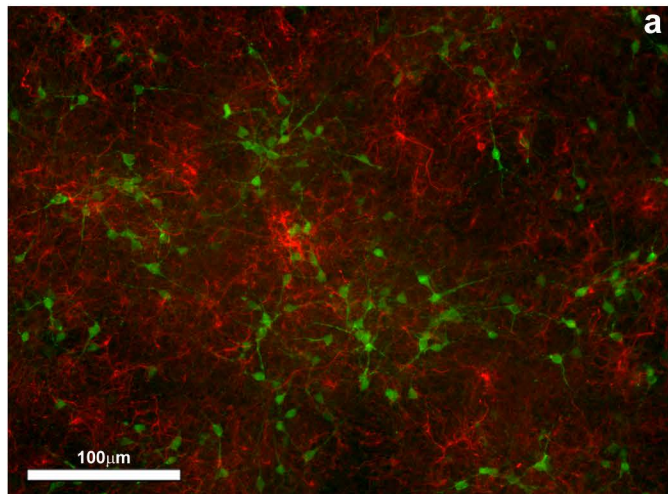

5 $\mu$ M Ara-C

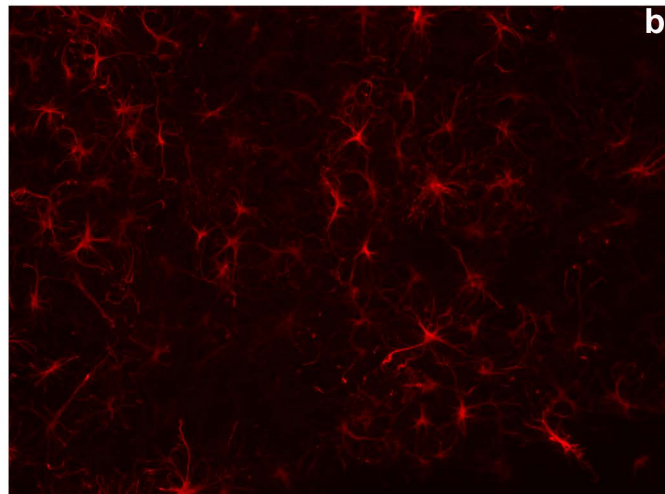

10 $\mu$ M Ara-C

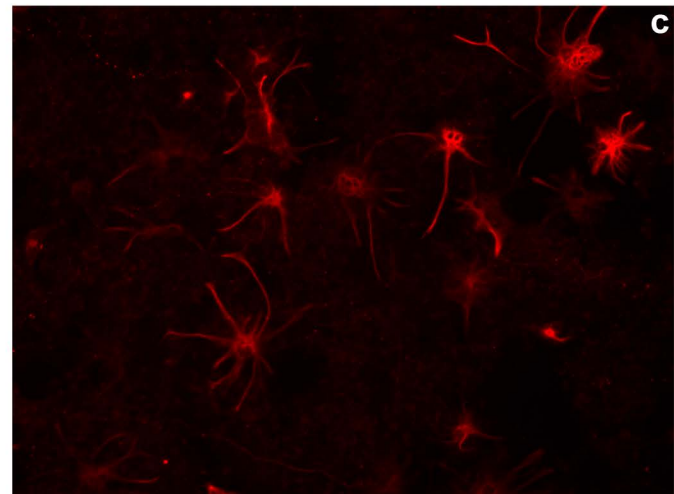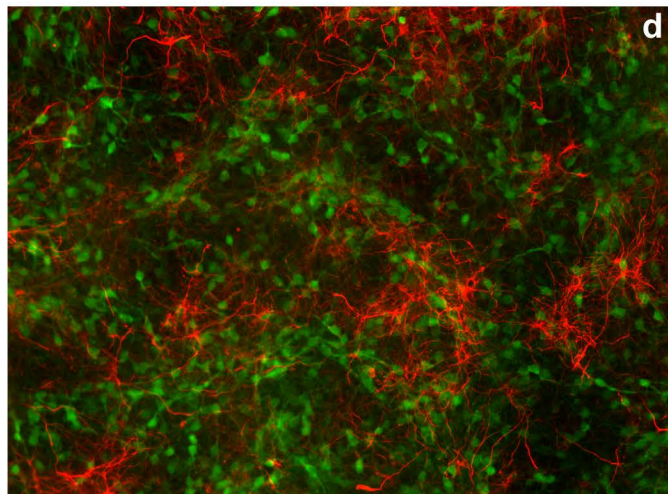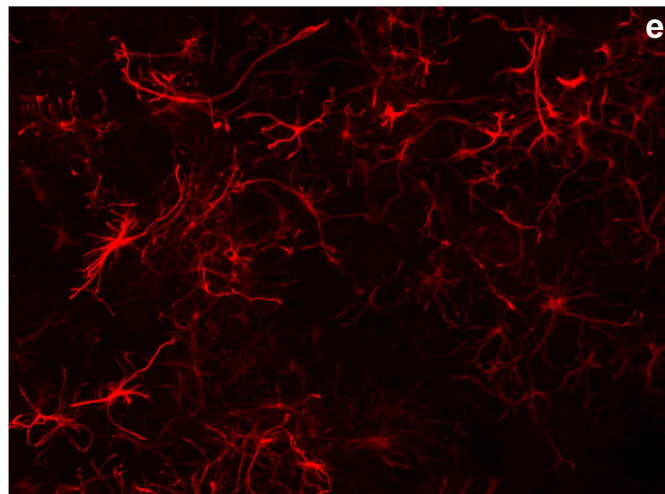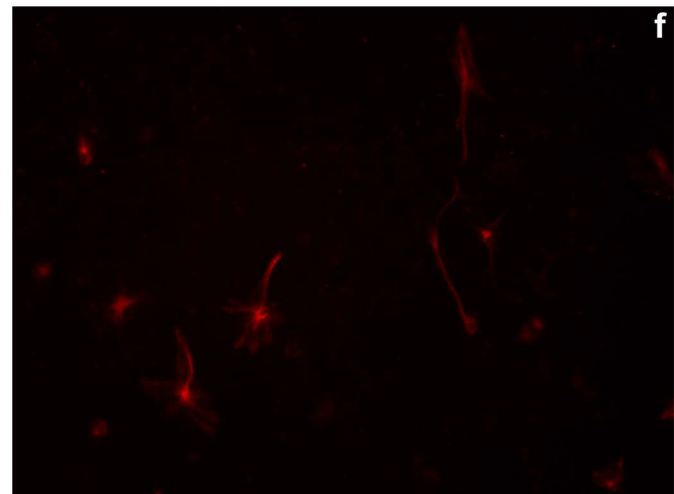

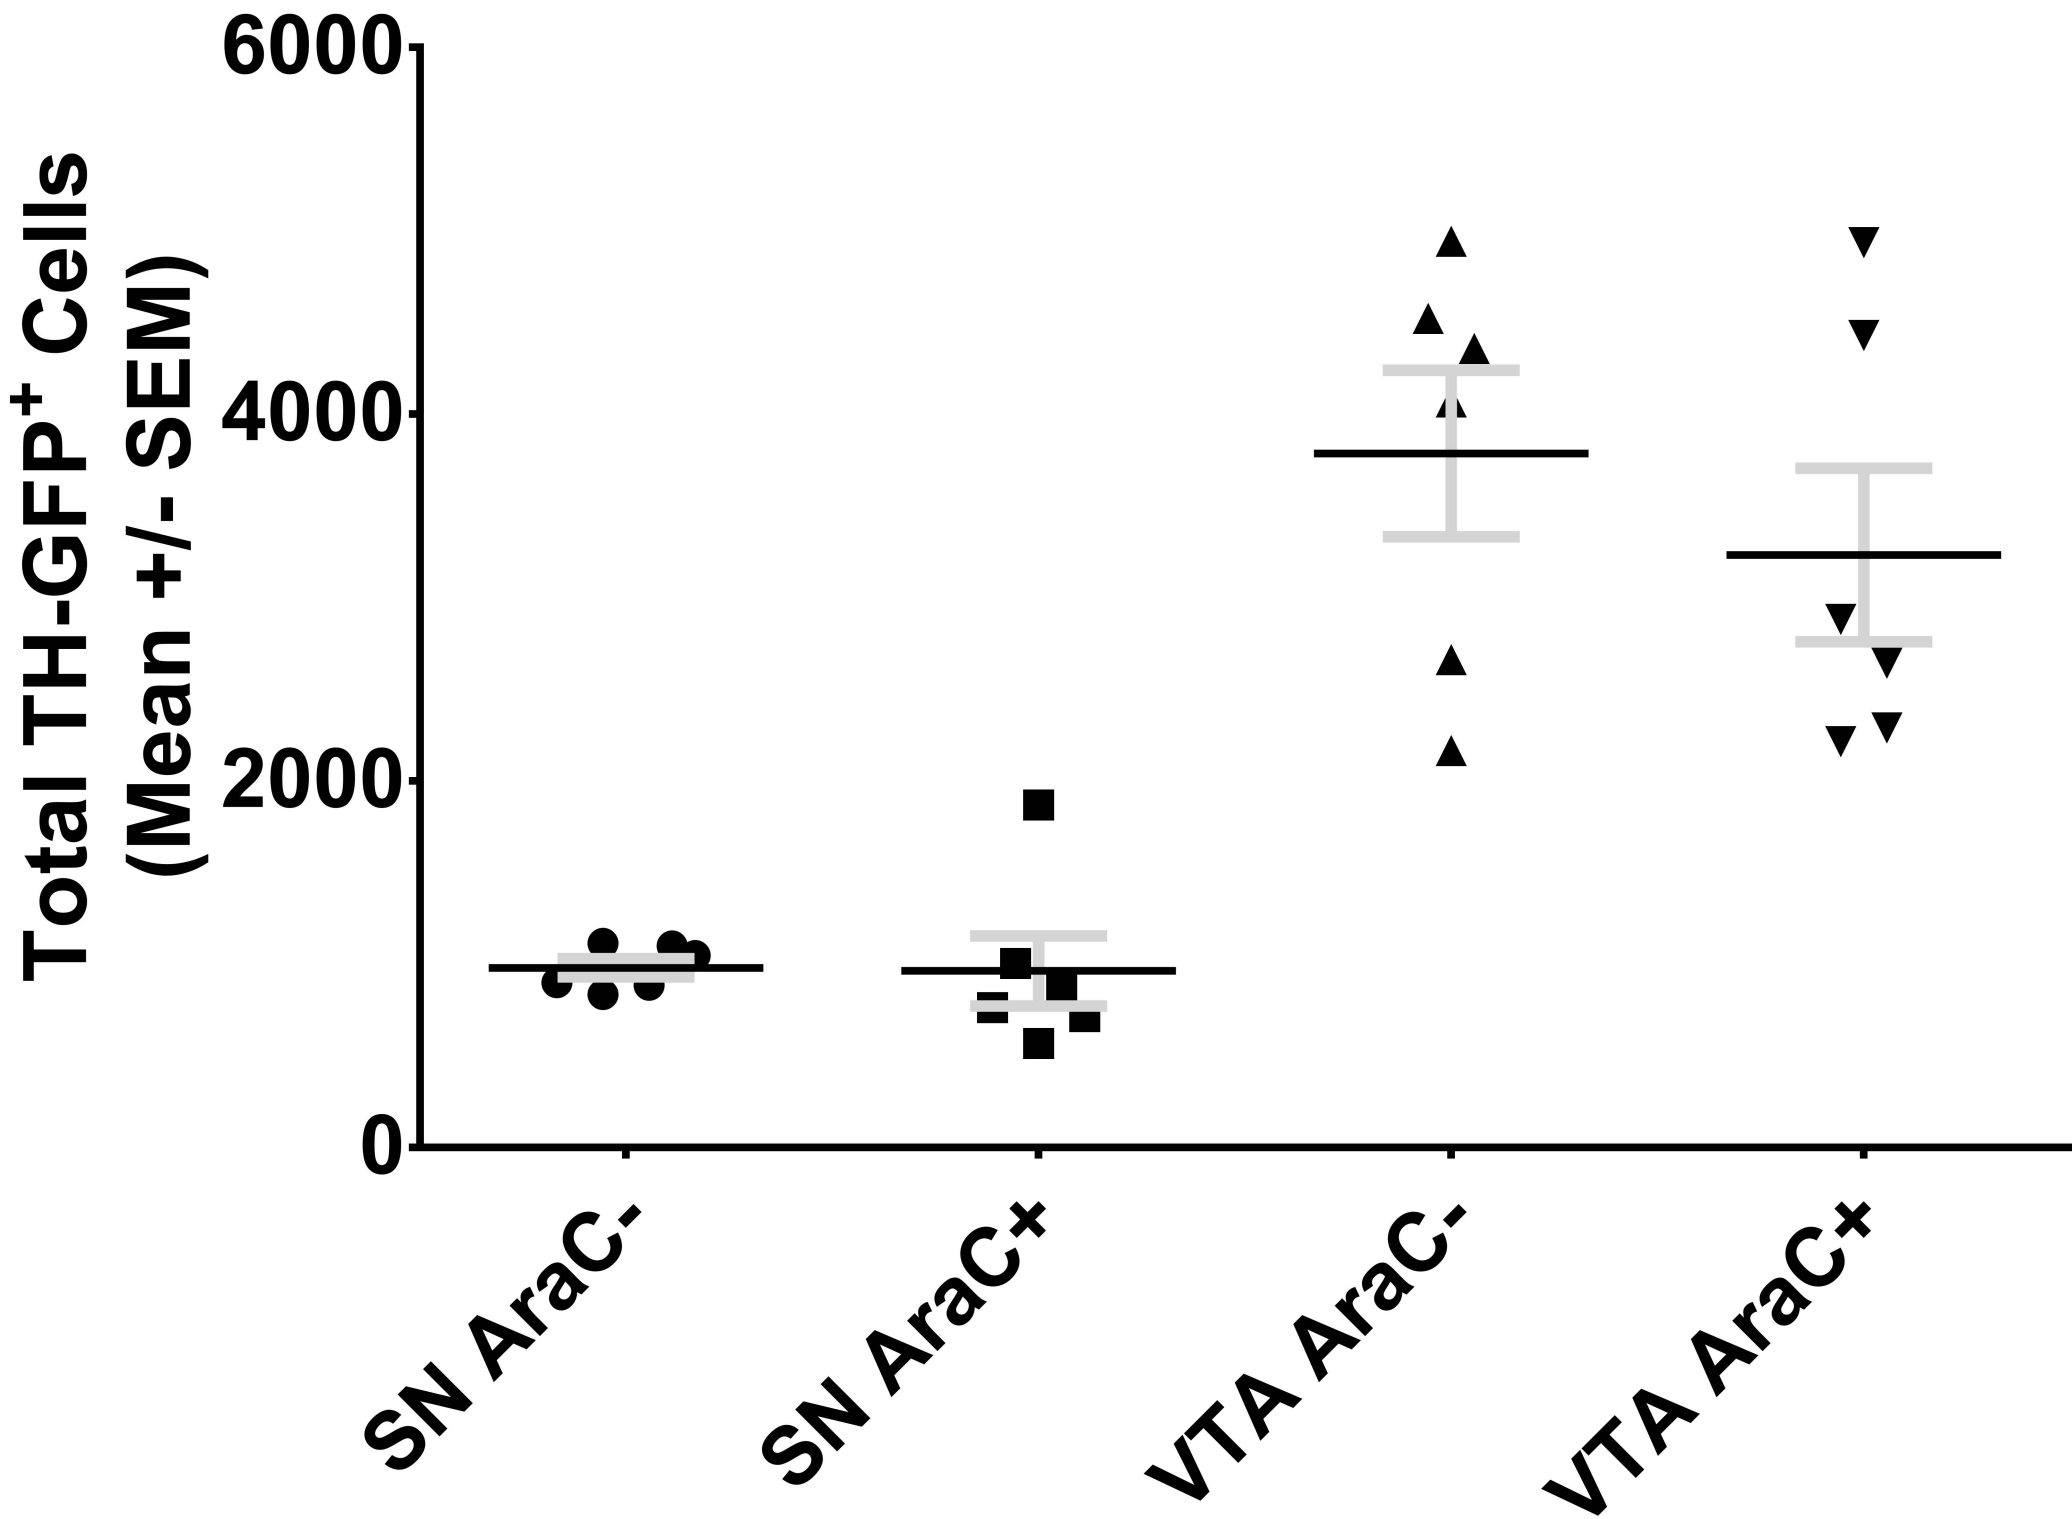

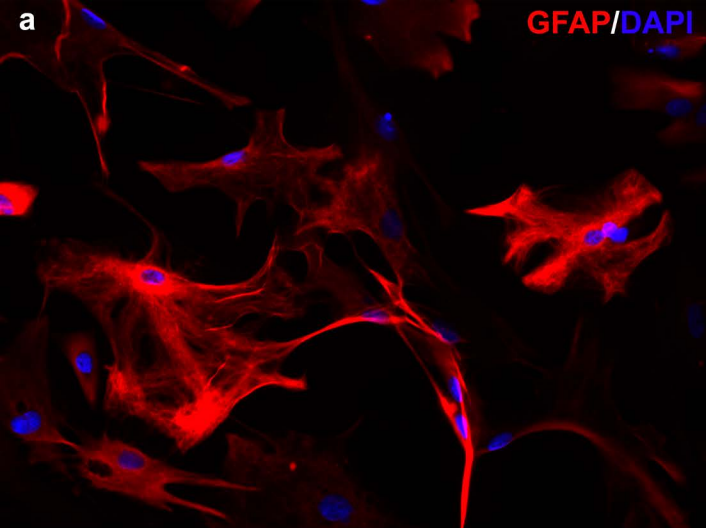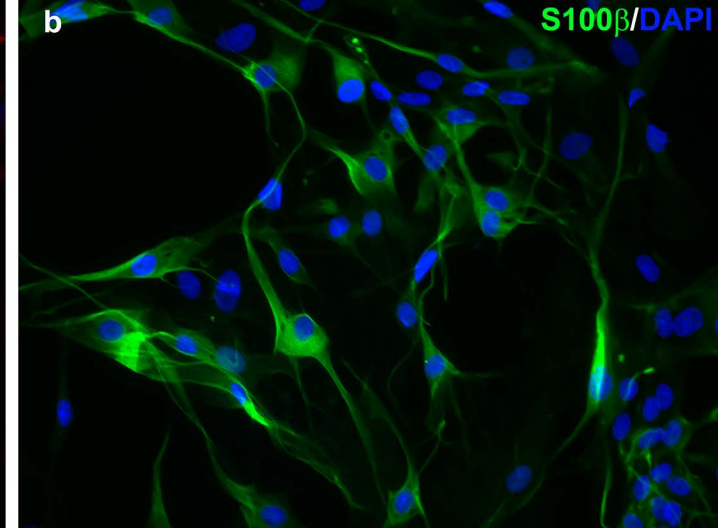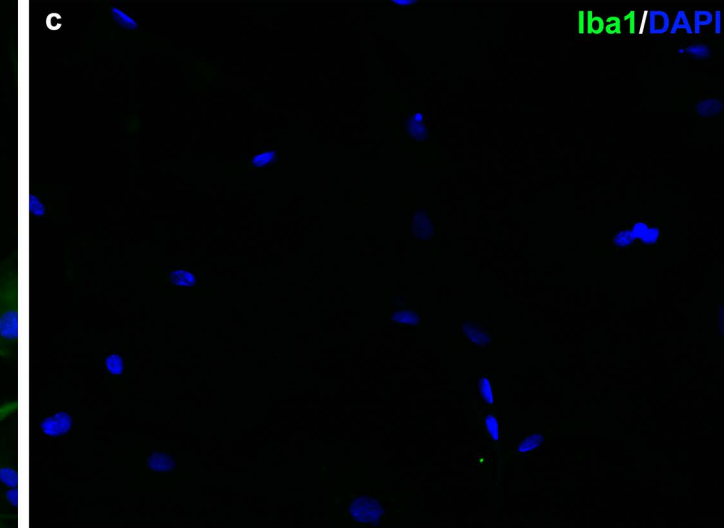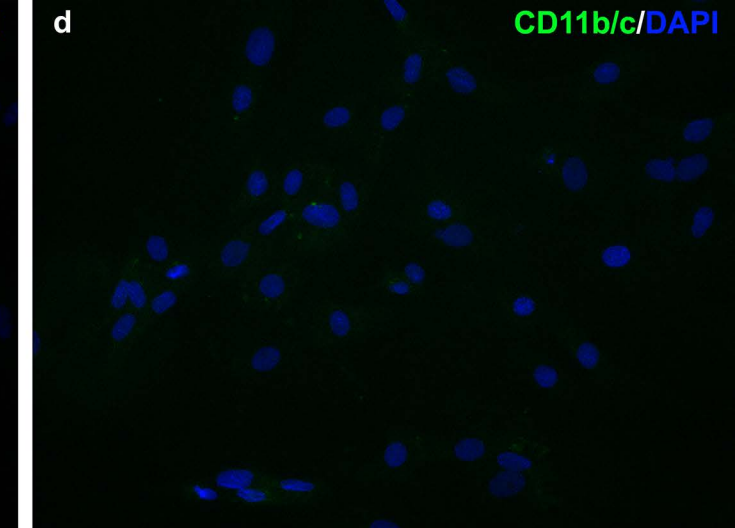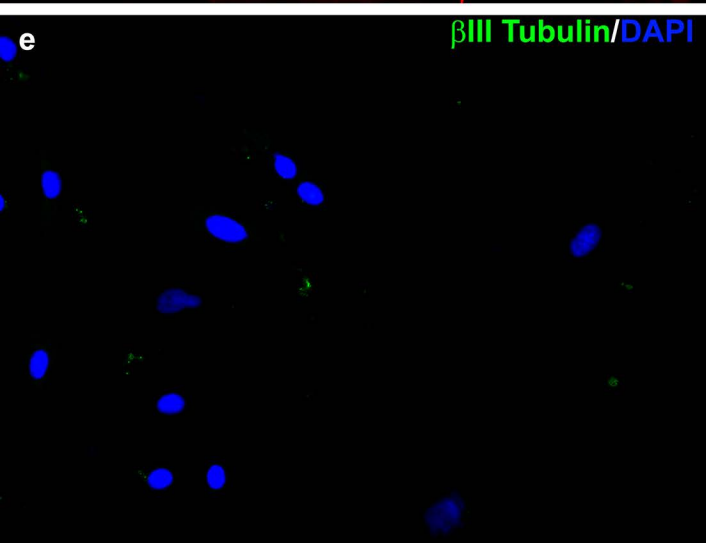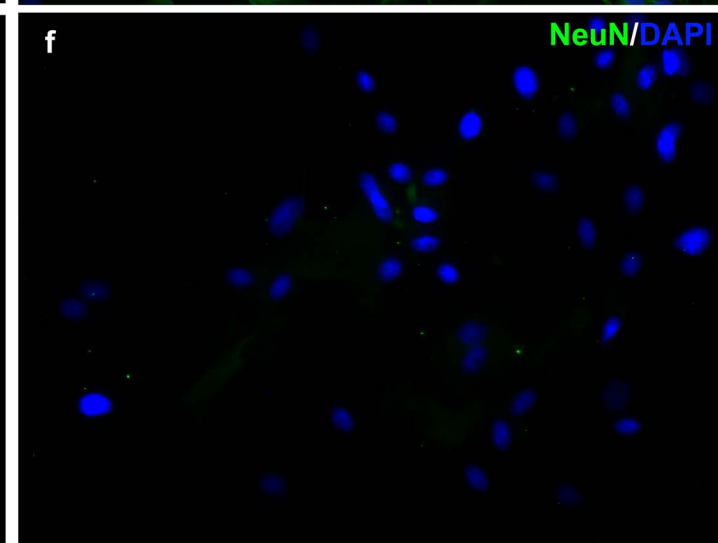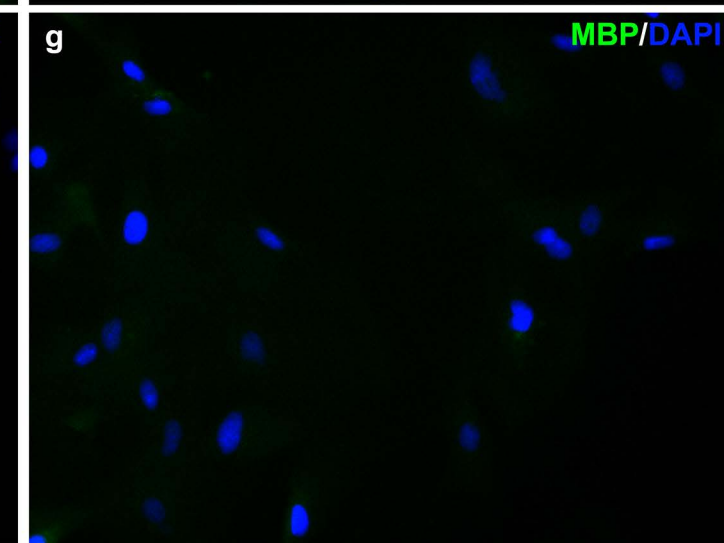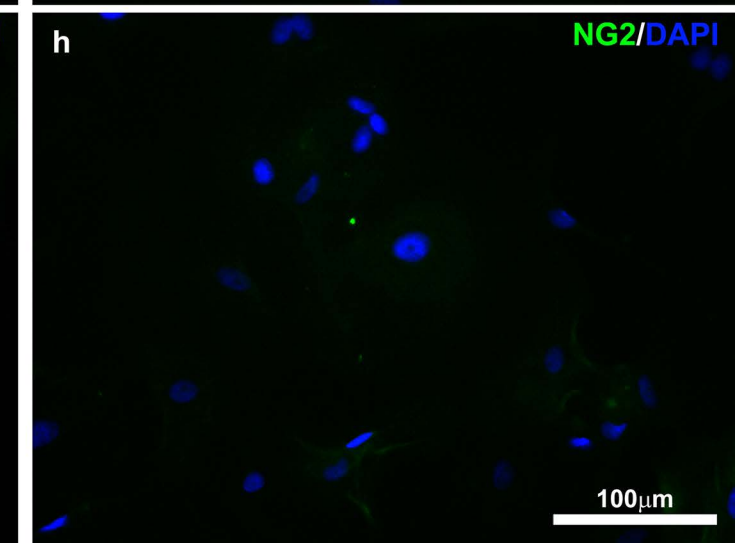

**a** $\Delta$ CT vs GAPDH  
(Mean +/- SEM)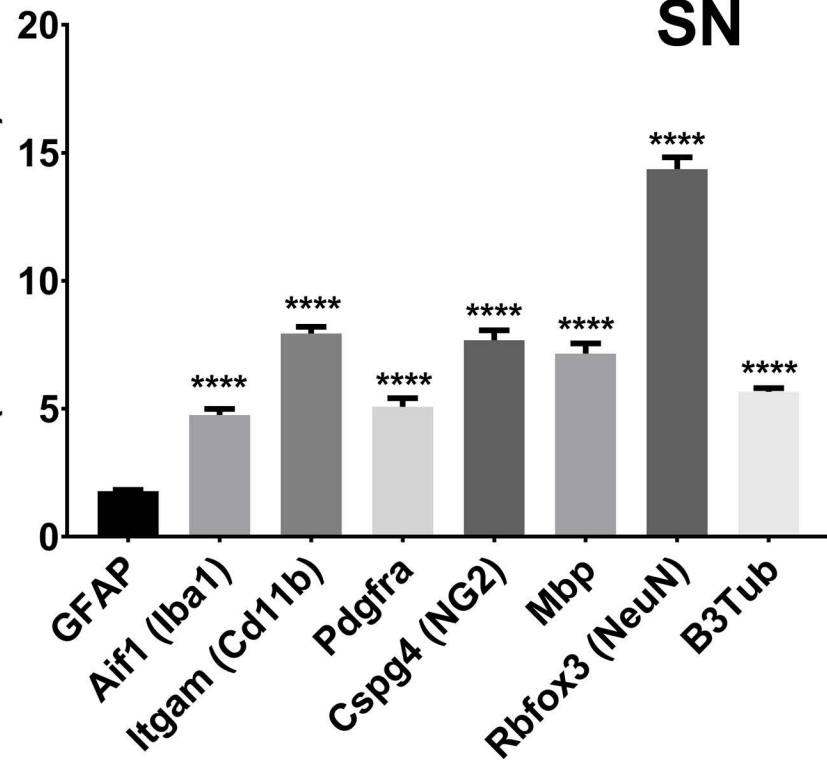**b** $\Delta$ CT vs GAPDH  
(Mean +/- SEM)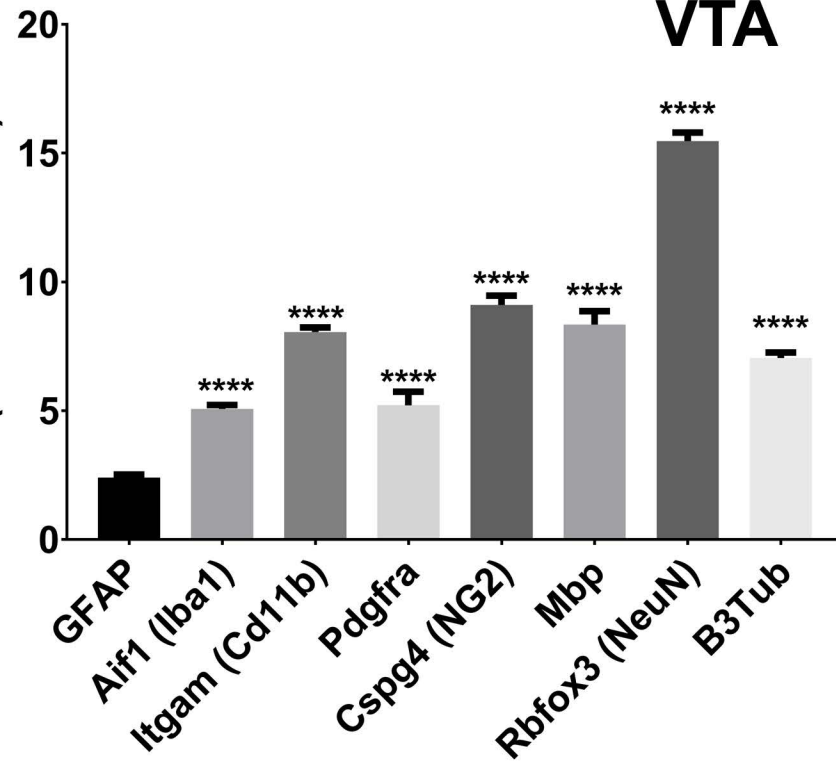**c** $\Delta$ CT vs GAPDH  
(Mean +/- SEM)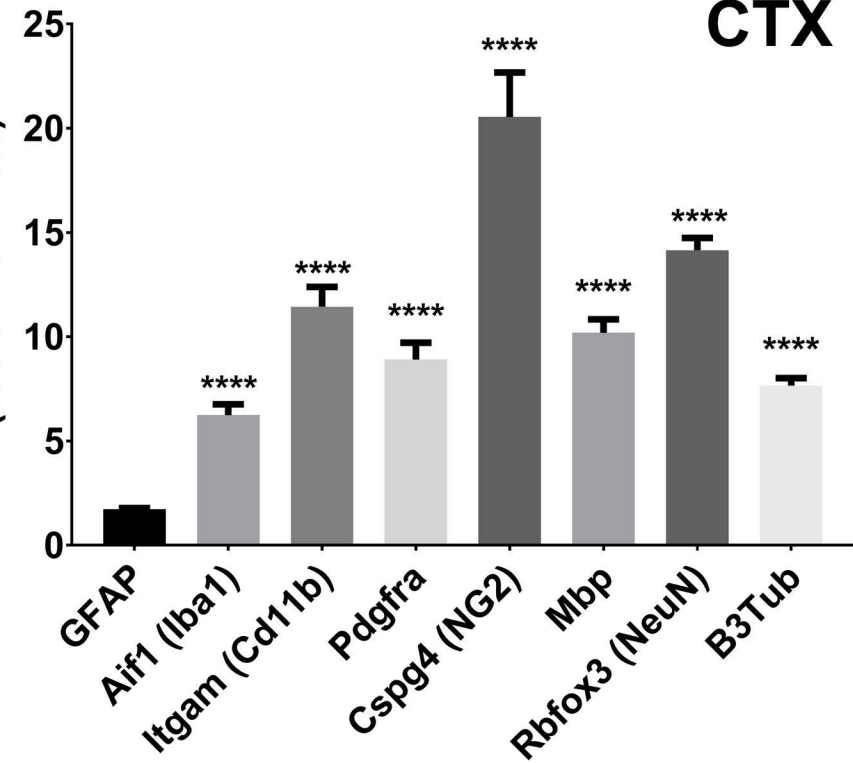

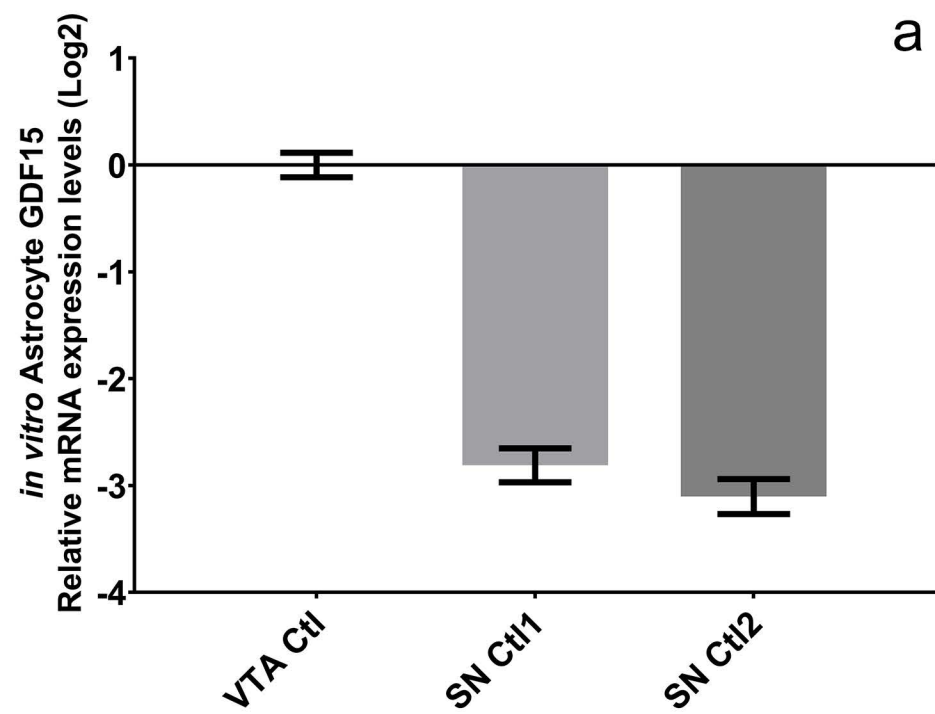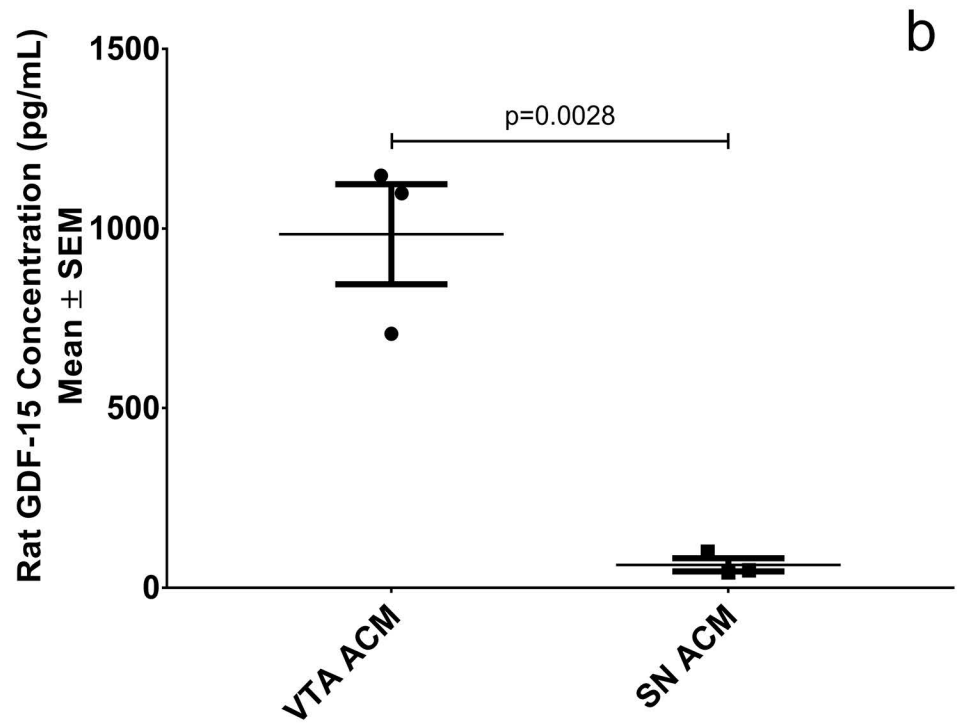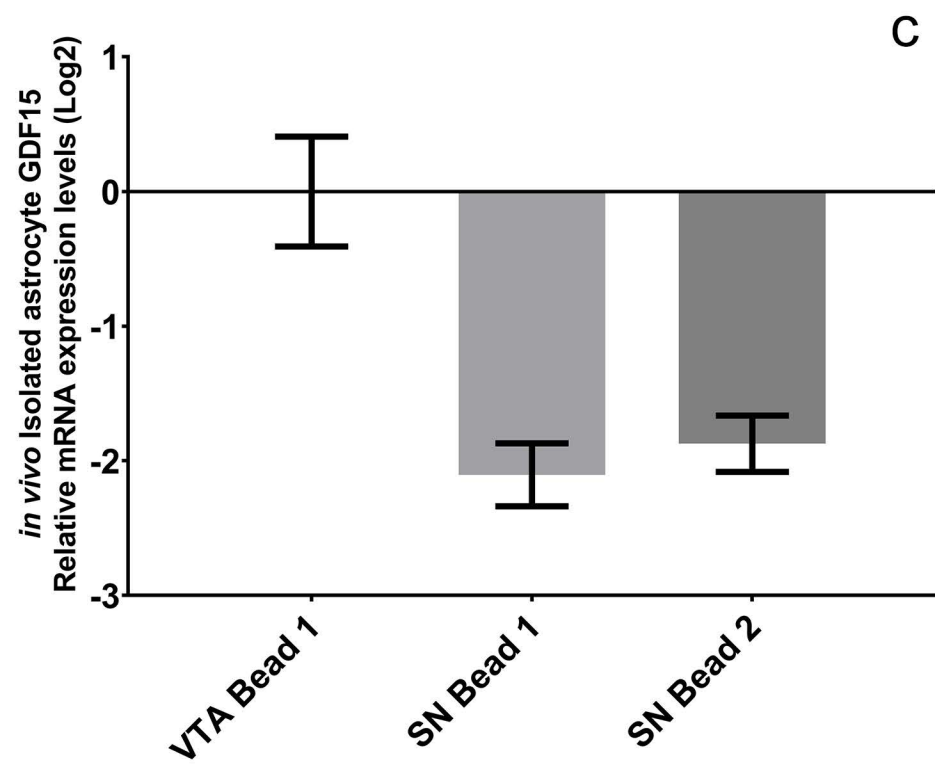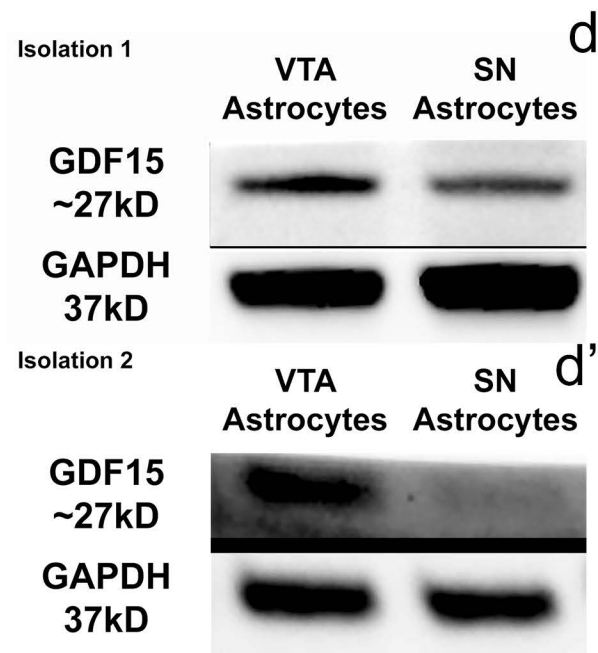

Relative VTA Astrocyte GDF15 mRNA expression levels (log2)

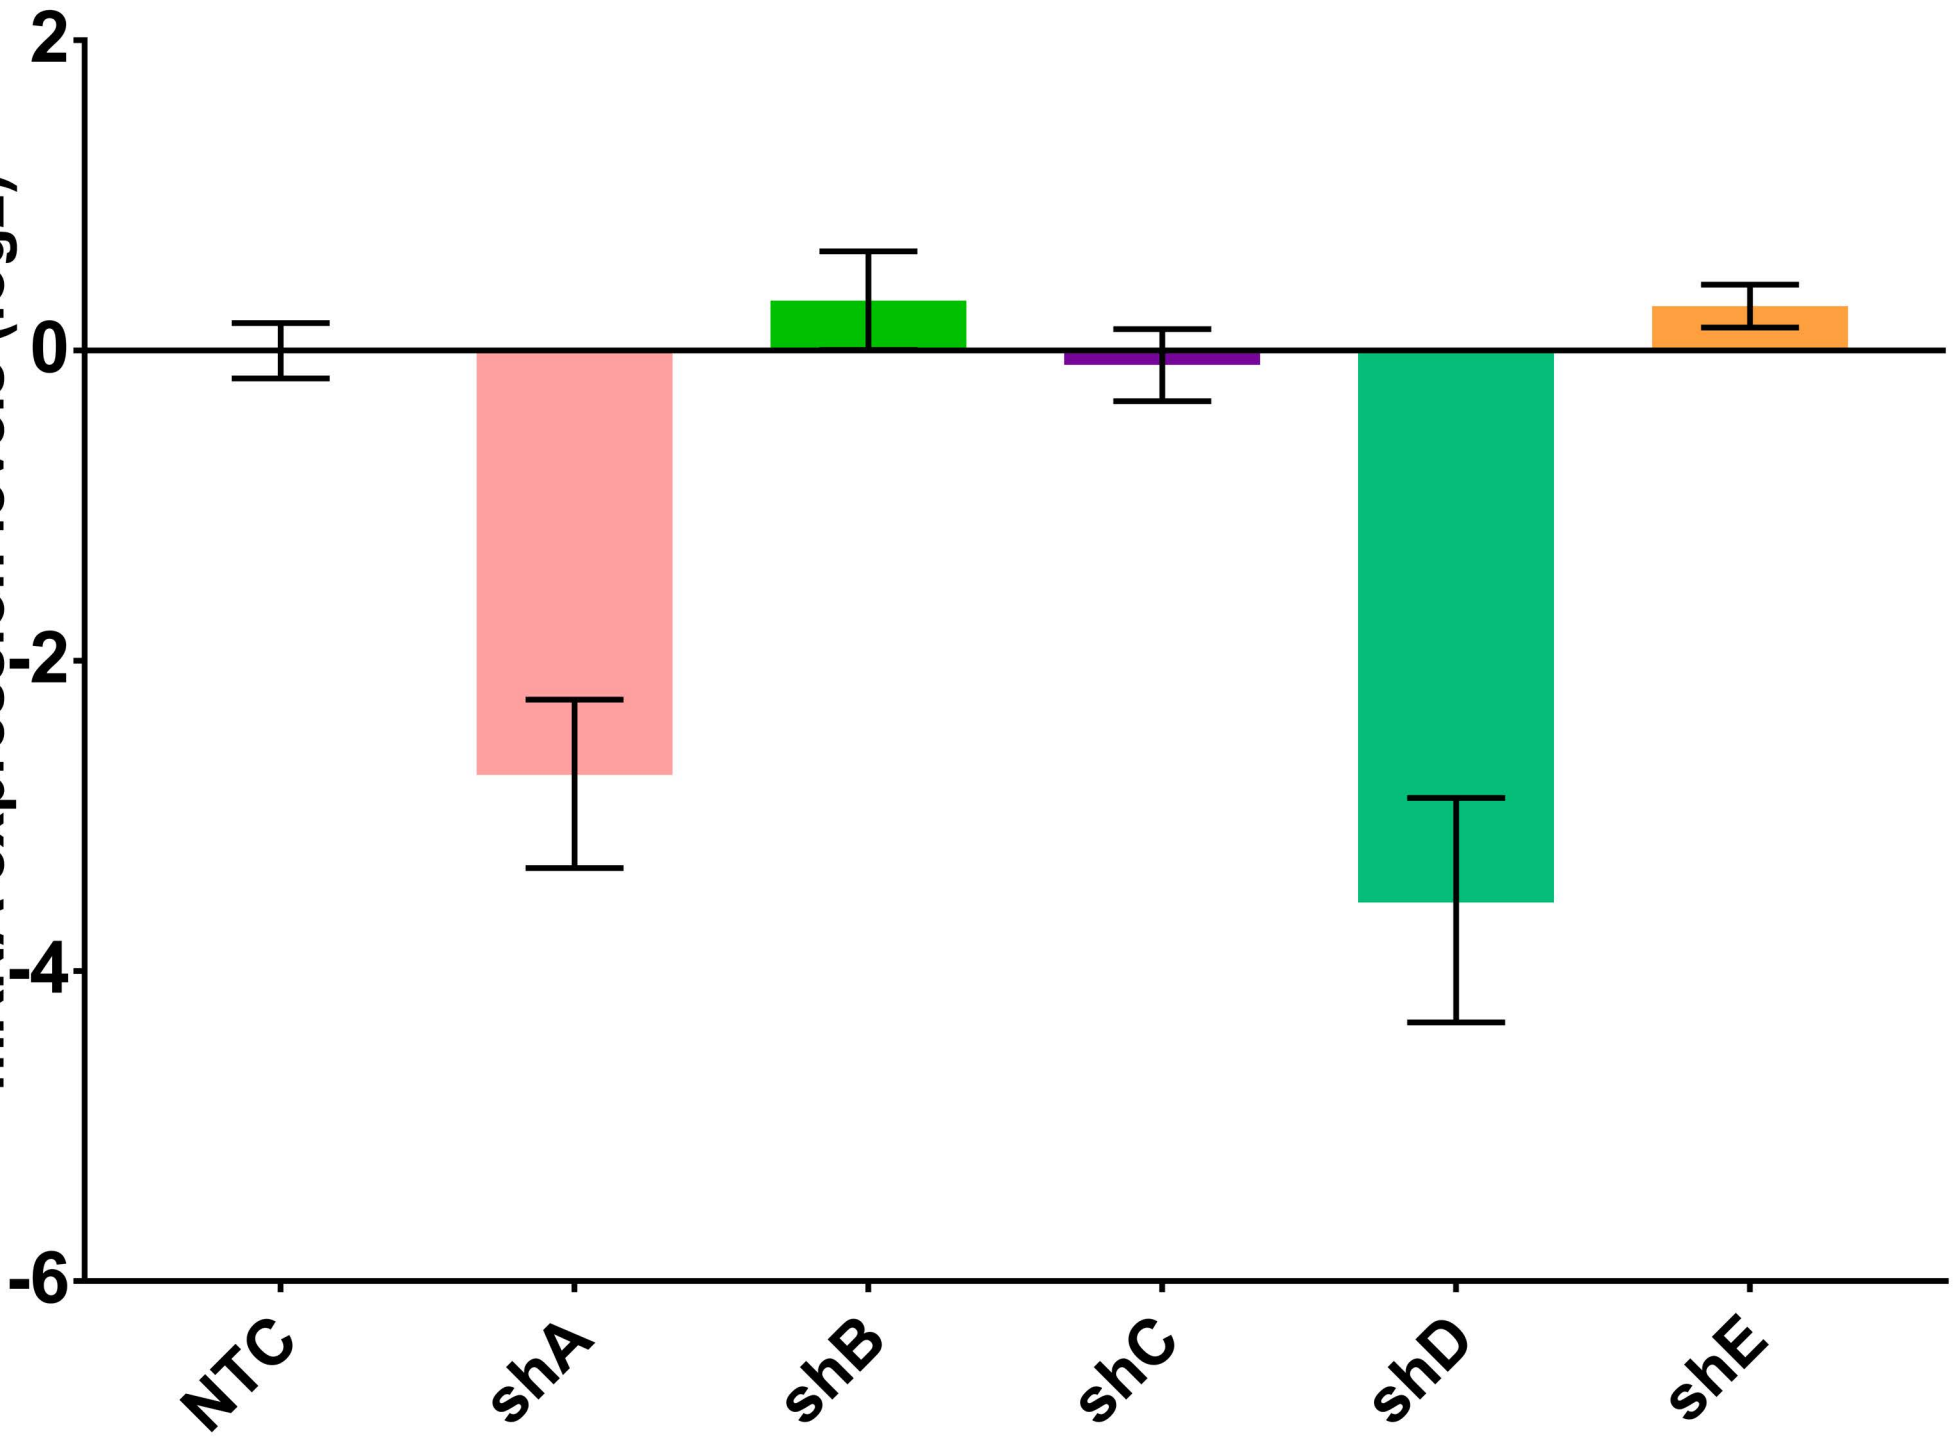

Supplement: NIHMS1024264-supplement-Supp_figS1-8.pdf [file NIHMS1024264-supplement-Supp_figS1-8.pdf]
